# Supplementary material for: Immobilized Metal Affinity Chromatography Co-Purifies TGF-β1 with Histidine-Tagged Recombinant Extracellular Proteins
Source: PubMed Central journal article supplement (PMC3485342; doi:10.1371/journal.pone.0048629), 2012-10-31
Supplement: pone.0048629.s001.pdf [file pone.0048629.s001.pdf]

## Supplemental Figure S1

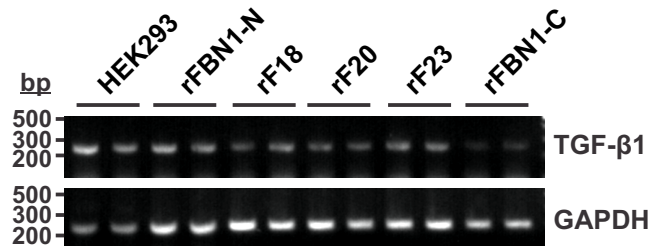

**Supplemental Figure S1. RT-PCR of transfected HEK293 clones to analyze the mRNA expression levels of TGF- $\beta$ 1.**

The mRNA expression level of TGF- $\beta$ 1 among HEK293 cell clones transfected with various fibrillin-1 fragments was analyzed by RT-PCR (40 cycles, 94°C, 60°C and 72°C; each for 1min). The primer pairs for TGF- $\beta$ 1 (NM\_000660.4) and GAPDH (NM\_002046.4) were as follows: TGF- $\beta$ 1 (sense: 5'-CCCACAACGAAATCTATGACAAG-3'; antisense: 5'-CGGTGACATCAAAGATAACCAC-3') GAPDH (sense: 5'-CCGCATCTTCTTTTGCCTCGC-3'; antisense: GACGGTGCCATGGAATTTGCC-3'). The expected product sizes are 258 bp for TGF- $\beta$ 1, and 226 bp for GAPDH. Note the expression of TGF- $\beta$ 1 in the rFBN1-C transfected HEK293 cell clone is lower compared to other stably transfected cell clones.
